# Supplementary material for: Insights into the reversible oxygen reduction reaction in a series of phosphonium-based ionic liquids
Source: Royal Society of Chemistry journal article supplement (doi:10.1039/c4cp04101a), 2014-01-01
Supplement: c4cp04101a1.pdf [file c4cp04101a1.pdf]

## Supporting information

# Insights into the reversible oxygen reduction reaction in a series of phosphonium-based ionic liquids

*Cristina Pozo-Gonzalo*<sup>\*a</sup>, *Patrick C. Howlett*<sup>a</sup>, *Jennifer L. Hodgson*<sup>b</sup>, *Louis A. Madsen*<sup>c</sup>, *Douglas R. MacFarlane*<sup>b</sup>, *Maria Forsyth*<sup>a</sup>

<sup>a</sup>ARC Centre of Excellence for Electromaterials Science, IFM-Institute for Frontier Materials, Deakin University, 221 Burwood Hwy, Burwood, Victoria 3125, Australia.

<sup>b</sup>ARC Centre of Excellence for Electromaterials Science, Monash University, Clayton, Victoria 3800, Australia.

<sup>c</sup> Department of Chemistry and Macromolecules and Interfaces Institute, Virginia Tech, Blacksburg, VA 24061 USA.

### AUTHOR INFORMATION

Corresponding Author

\* E-mail: [cpg@deakin.edu.au](mailto:cpg@deakin.edu.au); Tel.: +61 39244 6834; Fax: + 61 399054940.

## Supporting information – 1D NMR spectroscopy

### **$^{31}\text{P}$ and $^1\text{H}$ NMR on $\text{P}_{66614}\text{NTf}_2$ and its solutions with $\text{KO}_2$ and $\text{Na}_2\text{O}_2$ :**

All  $^{31}\text{P}$  and  $^1\text{H}$  NMR spectroscopy experiments were performed at 20°C using a Bruker Avance III 11 T spectrometer equipped with 5 mm axial saddle coils tuned to their respective nucleus Larmor frequencies (202.4 MHz for  $^{31}\text{P}$  and 500.1 MHz for  $^1\text{H}$ ).  $^{31}\text{P}$  NMR was carried out using a single 90° pulse with duration 6.7  $\mu\text{s}$ , relaxation delay time of 6 s, and 256 scans per spectrum.  $^1\text{H}$  NMR was carried out using a single 90° pulse with duration of 15.0  $\mu\text{s}$ , relaxation delay time of 5 s, and 32 scans per spectrum.

Figures S.1 and S.2 show representative results of these comparative spectral studies. No significant spectral changes are observed for the neat ILs relative to the ILs with  $\text{KO}_2$  or  $\text{Na}_2\text{O}_2$  dissolved. In other words, no new peaks or substantial changes in peak intensities or positions are observed. Relative to the main phosphorous peak or the main  $^1\text{H}$  peaks, we would be able to see the appearance of new peaks down to the  $\sim 0.01$  mol % level. The small impurity peaks in the  $^{31}\text{P}$  and  $^1\text{H}$  spectra are also no different in the pure IL spectra vs. the  $\text{KO}_2$  or  $\text{Na}_2\text{O}_2$  solution spectra. Comparative studies on these solutions using  $^{19}\text{F}$  and  $^{13}\text{C}$  spectroscopy showed the same null results.

Note that all spectra are only coarsely referenced in terms of chemical shift, due to the lack of a solvent (pure IL samples) or other internal standard. Minor differences in linewidths and peak shapes are attributed to differences in shimming (field homogeneity) since the individual samples were manually shimmed without a deuterated solvent.

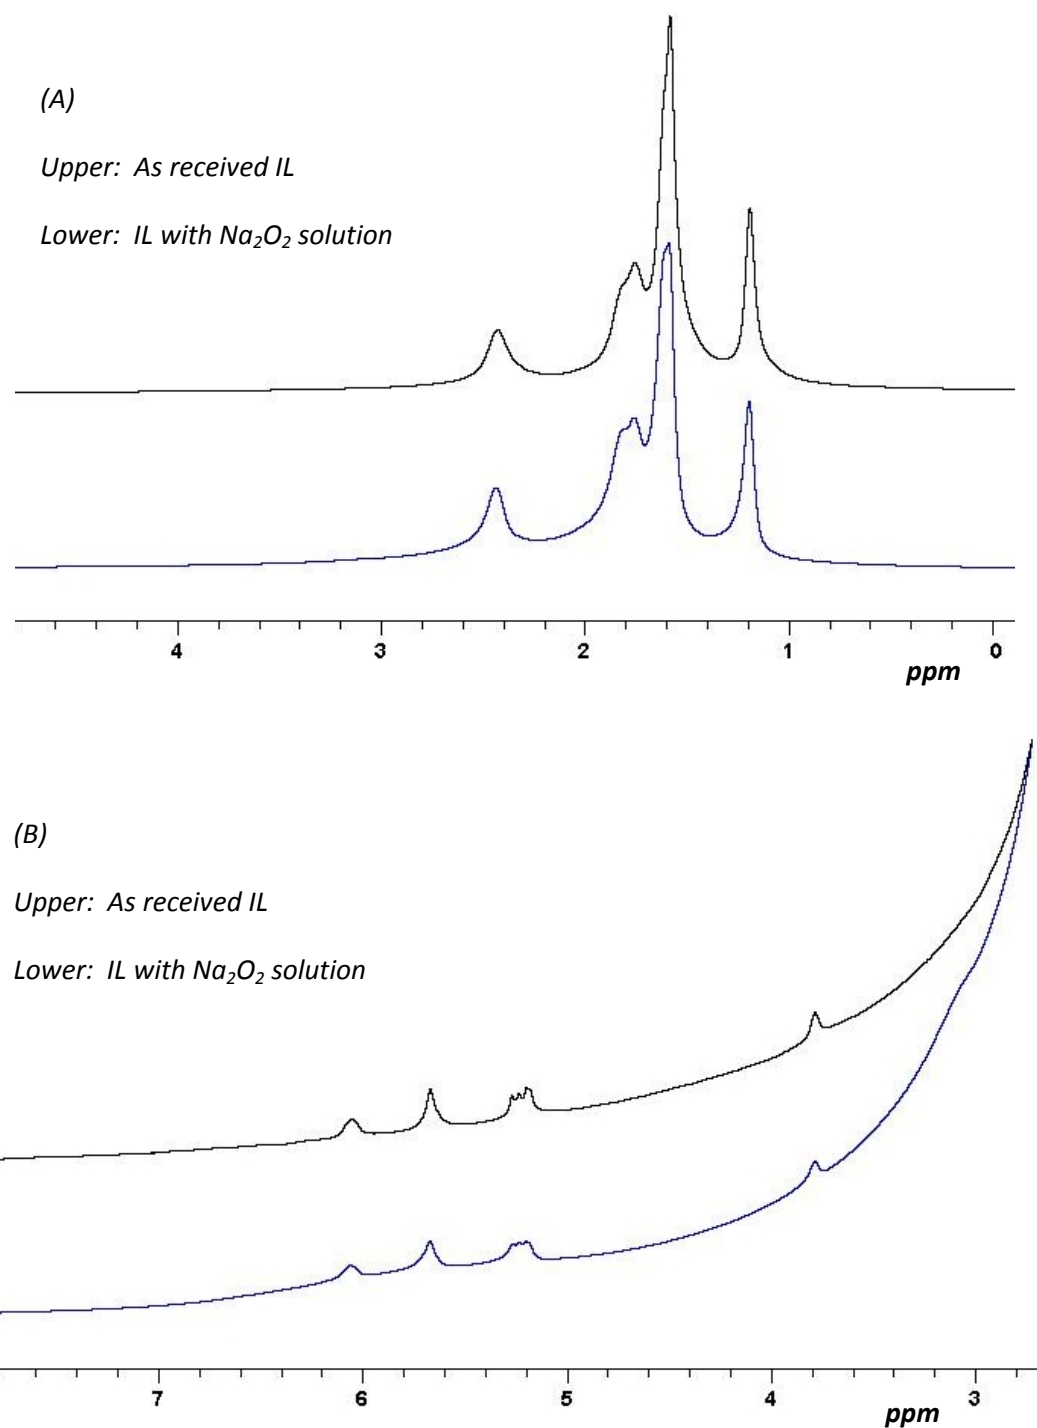

Figure S.1: Comparative  $^1\text{H}$  NMR spectra of neat  $\text{P}_{66614}\text{NTf}_2$  and saturated  $\text{Na}_2\text{O}_2$  solution with this IL.

(A) Main  $^1\text{H}$  NMR peaks for  $\text{P}_{66614}$  in the range 0 – 5 ppm. (B) Vertically expanded view of small downfield impurity peaks ( $\sim 0.1$  mol % of main peaks).

(A)

Upper: As received IL

Lower: IL solution with  $KO_2$

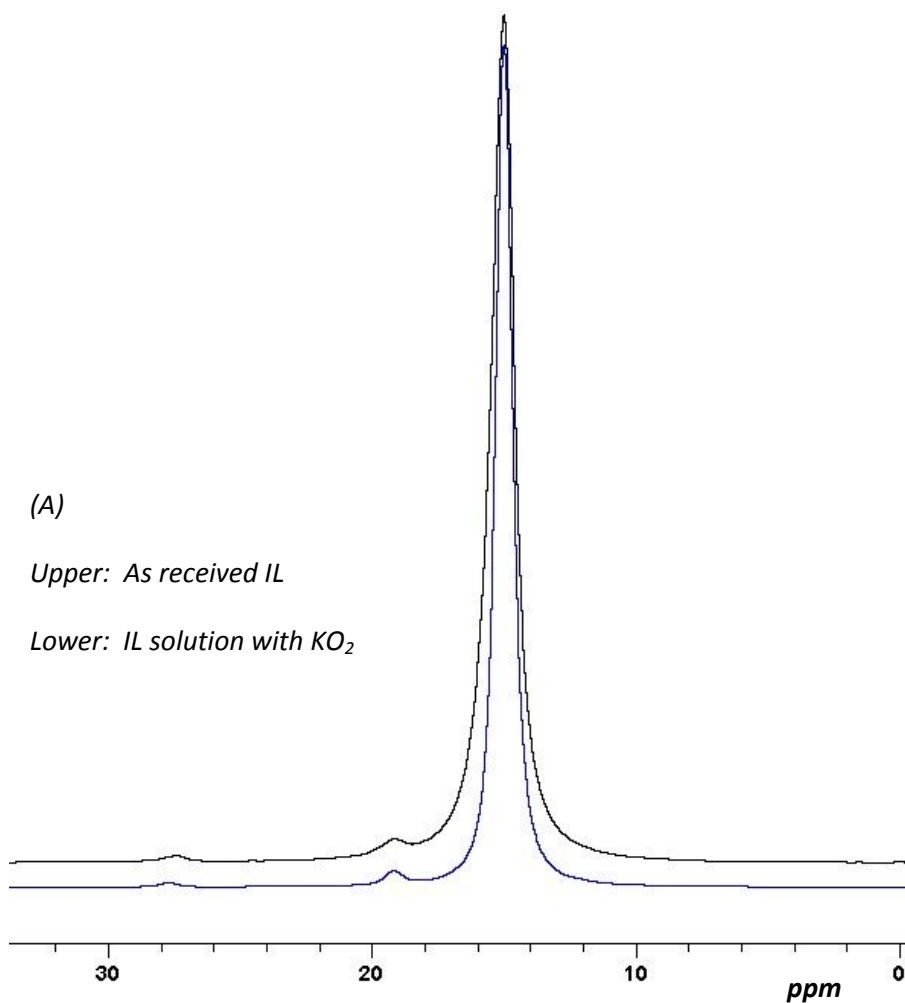

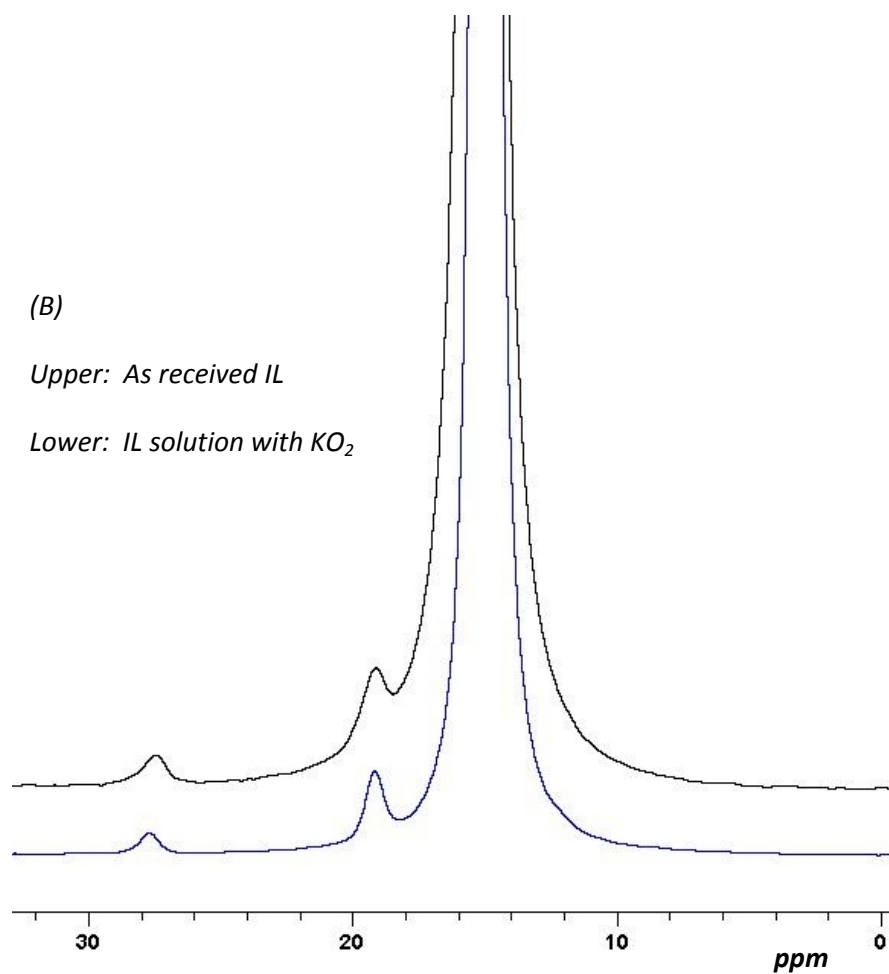

Figure S.2: Comparative  $^{31}P$  NMR spectra of neat  $P_{66614}NTf_2$  and saturated  $KO_2$  solution with this IL. (A)

$^{31}P$  NMR peaks for  $P_{66614}$ . (B) Vertically expanded view of  $^{31}P$  peaks ( $< 1$  mol % of main peaks).

Table S1. Gaussian archive entries for systems in this study.

**[N<sub>III</sub><sup>+</sup>]-O<sub>2</sub>**

```
1\1\GINC-GN167\FOpt\UM062X\Aug-CC-pVDZ\C4H12N1O2 (1+)\JLHODGSO\03-Aug-2
013\0\#\# um062x/aug-cc-pVDZ opt SCRF(CPCM,solvent=ethanol) freq=norama
n\o2-nme4_2_accdm06cpcm\1,1\C,0.060807748,-0.0000014452,1.4786908235
\N,-0.0206071451,-0.0000017102,-0.0124182803\C,-0.7507574792,1.2192984
051,-0.4714347138\C,1.3555527444,-0.000003828,-0.5919977375\C,-0.75076
13365,-1.2193003563,-0.4714337375\H,-0.9553819604,-0.0000119835,1.8805
147238\H,1.8770730864,0.8970782468,-0.2504710272\H,-0.2045394234,-2.10
07012017,-0.1271113925\H,-0.7982970796,1.2017302743,-1.5628599056\H,0.
5960873586,0.8973363192,1.7982552788\H,1.8770627842,-0.8970996509,-0.2
504911533\H,-0.7982756806,-1.2017476103,-1.5628604626\H,-1.7560746692,
1.2028386391,-0.0441086029\H,0.5961056912,-0.8973286336,1.7982543862\H
,1.2724209678,0.0000092765,-1.6815593486\H,-1.7560883212,-1.2028240598
,-0.0441305309\H,-0.204519015,2.1006981798,-0.1271361656\O,-0.03934757
61,0.0000033762,-3.8487794909\O,1.1252613058,0.0000301192,-4.091918663
\Version=AM64L-G09RevA.02\State=1-A\HF=-364.3825685\S2=0.\S2-1=0.\S2A
=0.\RMSD=3.644e-09\RMSF=1.480e-05\Dipole=-0.2687162,-0.0000083,1.94832
29\Quadrupole=-1.7256566,-0.8400804,2.565737,-0.0000151,-0.804292,-0.0
00018\PG=C01 [X(C4H12N1O2)]\@
```

**[N<sub>III</sub><sup>+</sup>]-O<sub>2</sub><sup>•-</sup>**

```
1\1\GINC-GN159\FOpt\UM062X\Aug-CC-pVDZ\C4H12N1O2 (2)\JLHODGSO\06-Aug-20
13\0\#\# um062x/aug-cc-pVDZ opt SCRF(CPCM,solvent=ethanol) freq=noraman
\o2_radan-nme4_5_accdm06cpcm\0,2\C,-0.0598806539,-0.0041000478,1.432
7623125\N,0.0120531787,-0.000938589,-0.0537868575\C,-0.6692139048,1.21
29697676,-0.5980646608\C,1.4410404413,0.0026318855,-0.4904666036\C,-0.
```

664862213,-1.2151132019,-0.6028118383\H,-1.1111754461,-0.0062943976,1.  
731041531\H,1.9209774304,0.8995185213,-0.0898888902\H,-0.136460674,-2.  
0988752287,-0.2351948821\H,-0.6309481117,1.1450964724,-1.689476093\H,0  
.4391615611,0.8933010666,1.8076437714\H,1.9243594036,-0.8941653034,-0.  
0937887247\H,-0.6294053528,-1.1420996567,-1.6939948898\H,-1.7033955506  
,1.2100264718,-0.2431790761\H,0.4418929484,-0.9015154795,1.8039220705\  
H,1.4424576151,0.0051349922,-1.5841438166\H,-1.6983506207,-1.218546979  
7,-0.2458770838\H,-0.1453517921,2.0971406058,-0.2250036207\O,0.1912060  
95,0.0096953685,-3.4826125185\O,-1.1183803539,0.0061347327,-3.62749312  
98\\Version=AM64L-G09RevA.02\State=2-A\HF=-364.5773657\S2=0.757528\S2-  
1=0.\S2A=0.750025\RMSD=8.041e-09\RMSF=1.199e-05\Dipole=0.844899,-0.015  
4208,6.0383342\Quadrupole=4.8266274,7.4227207,-12.249348,0.0019241,-2.  
7404451,0.0463761\PG=C01 [X(C4H12N1O2)]\@

## [N<sub>III</sub><sup>+</sup>]-O<sub>2</sub><sup>2-</sup>

1\1\GINC-NN104\FOpt\UM062X\Aug-CC-pVDZ\C4H12N1O2(1-)\JLHODGSO\04-Aug-2  
013\0\# um062x/aug-cc-pVDZ opt SCRF(CPCM,solvent=ethanol) freq=norama  
n\o2\_2an-nme4\_3\_accdm06cpcm\|-1,1\C,-1.6317199994,0.2809681846,1.7162  
252057\N,-0.1876916918,0.1809460792,1.340570935\C,-0.0469187686,-0.289  
4467346,-0.0621465266\C,0.437785731,1.5296426778,1.5027394907\C,0.4834  
733696,-0.7695170494,2.2797469287\O,-0.5499501035,1.2770383502,4.34730  
47836\O,-0.5995545682,1.6291025159,5.7971829223\H,-2.0818993912,-0.710  
390972,1.6090273489\H,1.4980369693,1.4474122219,1.2456801839\H,0.33501  
39369,-0.3531225627,3.2883214824\H,-0.5476823201,0.4238984105,-0.72242  
99281\H,-1.654793187,0.6366633738,2.7597104954\H,-2.1126600734,0.98736  
81174,1.0326398511\H,-0.0622843904,2.2208635388,0.8178773299\H,0.28813  
46826,1.8124191228,2.5575659004\H,0.0144045565,-1.7514935998,2.1674299  
172\H,1.5423377269,-0.8253880336,2.0108711042\H,1.0171730148,-0.347939  
5868,-0.3068395646\H,-0.5091944939,-1.2763650539,-0.1504338605\\Versio  
n=AM64L-G09RevA.02\State=1-A\HF=-364.6372076\S2=0.\S2-1=0.\S2A=0.\RMSD

=7.573e-09\RMSF=1.108e-04\Dipole=1.1845547,-3.866844,-11.2991608\Quadrupole=19.1343722,13.7836579,-32.9180301,1.7658618,5.1440146,-17.482704  
\PG=C01 [X(C4H12N1O2)]\@

## [P<sub>III</sub><sup>+</sup>]-O<sub>2</sub>

1\1\GINC-GN139\FOpt\UM062X\Aug-CC-pVDZ\C4H12O2P1 (1+) \JLHODGSO\07-Aug-2013\0\#\# um062x/aug-cc-pVDZ opt SCRF(CPCM,solvent=ethanol) freq=normal\n\o2-pme4\_1cc\_accdm06cpcm\1,1\C,-0.001901282,0.0470686953,1.8139824468\P,-0.0015721202,-0.0428545743,0.011024185\C,-0.8225568414,-1.5659882634,-0.5058998948\C,-0.8847691589,1.3806632412,-0.6607419345\C,1.7042418998,-0.0341825686,-0.5815372189\O,-0.0727786489,-0.1061638964,-3.6669221107\O,-0.6543041816,0.8346499387,-4.1049433811\H,-1.0358502979,0.0419562126,2.1735412134\H,2.1843318072,0.8981619588,-0.2663616645\H,-0.291576962,-2.4216363248,-0.076026461\H,-0.8841855511,1.3264348241,-1.7542179684\H,0.4958896683,0.9702744573,2.1274354655\H,2.2358675298,-0.8897911109,-0.1524026399\H,-0.8095497226,-1.6294463469,-1.5983117373\H,-1.9145559492,1.3686212315,-0.2886614175\H,0.5348949449,-0.8186650548,2.2152472737\H,1.7068706744,-0.1031186891,-1.6736798899\H,-1.8567542439,-1.5510086501,-0.1463619996\H,-0.3832195648,2.29746092,-0.3338172664\Version=AM64L-G09RevA.02\State=1-A\HF=-651.0089777\S2=0.\S2-1=0.\S2A=0.\RMSD=6.420e-09\RMSF=8.848e-06\Dipole=0.1507349,-0.1665374,1.6841333\Quadrupole=-0.7298974,-1.2065679,1.9364653,0.4131251,0.4324154,-0.5



937707\PG=C01 [X(C4H12O2P1)]\@

### [P<sub>1111</sub><sup>+</sup>]-O<sub>2</sub><sup>•-</sup>

```
1\1\GINC-GN209\FOpt\UM062X\Aug-CC-pVDZ\C4H12O2P1 (2) \JLHODGSO\07-Aug-20
13\0\# um062x/aug-cc-pVDZ opt SCRF(CPCM,solvent=ethanol) freq=noraman
\o2_radan-pme4_5c_accdm06cpcm\0,2\C,-0.148561,-0.047828,1.67908\P,-0
.019705,-0.048893,-0.12893\C,-0.848629,1.430537,-0.748241\C,1.725397,-
0.008419,-0.583673\C,-0.837227,-1.552249,-0.709128\H,-1.204501,-0.0873
51,1.967029\H,2.232153,0.722421,0.056253\H,-0.340719,-2.415741,-0.2530
01\H,-1.908978,1.388001,-0.478097\H,0.30922,0.863636,2.07739\H,2.15969
9,-1.00092,-0.423303\H,-0.757637,-1.589944,-1.797587\H,-0.384414,2.306
621,-0.282043\H,0.373197,-0.925763,2.0751\H,1.780388,0.287347,-1.63914
\H,-1.885671,-1.525024,-0.393241\H,-0.715347,1.45702,-1.833787\O,0.218
492,-0.14551,-3.246304\O,0.978561,0.892063,-3.521374\Version=AM64L-G0
9RevA.02\State=2-A\HF=-651.204383\S2=0.757374\S2-1=0.\S2A=0.750025\RMS
D=8.331e-09\RMSF=1.409e-05\Dipole=-1.0763102,-0.7264266,5.5114023\Quad
rupole=6.2217502,6.1371497,-12.3588999,-1.4654098,3.5320865,2.6757295\
PG=C01 [X(C4H12O2P1)]\@
```

### [P<sub>1111</sub><sup>+</sup>]-O<sub>2</sub><sup>•-</sup> (gas phase)

1\1\GINC-NN108\FOpt\UM062X\Aug-CC-pVDZ\C4H12O2P1 (2) \JLHODGSO\19-Feb-20

14\0\#\# um062x/aug-cc-pVDZ opt freq=noraman\o2\_radan-pme4\_2cc\_accdm06  
\0,2\C,-0.0680014277,0.0460067012,1.4024037591\P,0.0191530136,-0.0339  
804247,-0.4700798189\C,-0.8880383201,1.5149776447,-0.8273428553\C,1.84  
28567473,-0.0718914407,-0.6284907693\C,-0.8896467358,-1.6147012953,-0.  
6345332325\H,-1.1104244691,0.0851590205,1.7440938043\H,2.3218236552,0.  
0303249176,0.3484642307\H,-0.3164063545,-2.3859634494,-0.1069714138\H,  
-1.8321206737,1.2376164881,-1.3094594675\H,0.4479488493,0.9468143971,1  
.7601792244\H,2.1156979036,-1.023752251,-1.0966553932\H,-1.0315901968,  
-1.8941651771,-1.6790514952\H,-1.0790801383,2.0774358137,0.0901691164\  
H,0.4161632222,-0.8311373663,1.8513383792\H,2.1412082419,0.7297289362,  
-1.309857473\H,-1.8553852727,-1.5021765591,-0.1287060737\H,-0.30259327  
51,2.0967536392,-1.5445942093\O,0.078781829,-0.1868634186,-2.531046844  
9\O,0.7153764017,0.7798158237,-3.1128564673\Version=AM64L-G09RevA.02\  
State=2-A\HF=-651.1867429\S2=0.756266\S2-1=0.\S2A=0.750022\RMSD=4.811e  
-09\RMSF=3.757e-05\Dipole=-0.3400931,-0.3262506,1.9050515\Quadrupole=3  
.5946635,3.1314492,-6.7261127,-0.6589698,1.4170266,0.9970583\PG=C01 [X  
(C4H12O2P1)]\@

## [P<sub>III</sub><sup>+</sup>]-O<sub>2</sub><sup>2-</sup>

1\1\GINC-GN115\FOpt\UM062X\Aug-CC-pVDZ\C4H12O2P1(1-)\JLHODGSO\04-Aug-2

013\0\#\# um062x/aug-cc-pVDZ opt SCRF(CPCM,solvent=ethanol) freq=norama

n\o2\_2an-pme4\_3\_accdm06cpcm\ -1,1\C,-1.6994939737,-0.1929750914,2.705  
4910075\P,-0.3765113198,0.54119826,1.6526500038\C,0.6310850463,-1.1327  
45502,1.7180481123\C,-0.4764228772,0.3914373158,-0.193976744\C,1.03881  
80109,1.4410410928,2.4176339317\O,-1.5307700248,2.6897540211,2.7329958  
051\O,-1.3048203934,2.0549987622,1.4527748646\H,-2.2026824166,-0.94757  
35551,2.0860948234\H,1.8533847548,1.4205757394,1.6814890587\H,0.907249  
3297,-1.3801594814,2.7531977096\H,-1.0483828711,1.2047349544,-0.643518  
6571\H,-1.2620616746,-0.7032440207,3.5709615413\H,-2.3887639108,0.5930  
241612,3.0188642419\H,0.734313052,2.4612090739,2.6567934582\H,1.382779  
3857,0.9148508866,3.3154523981\H,0.0373497454,-1.968112624,1.317661545  
4\H,1.5575455915,-1.0614951907,1.1286325377\H,0.5480108694,0.386485666  
4,-0.5859140792\H,-0.9321743236,-0.5759524685,-0.435905559\Version=AM  
64L-G09RevA.02\State=1-A\HF=-651.309509\S2=0.\S2-1=0.\S2A=0.\RMSD=4.62  
2e-09\RMSF=1.660e-05\Dipole=2.0250455,-3.6328359,-1.254569\Quadrupole=  
3.0194949,-8.7830117,5.7635168,9.8035977,2.5510599,-4.8184823\PG=C01 [  
X(C4H12O2P1)]\@

### **[P<sub>2222</sub><sup>+</sup>]-O<sub>2</sub><sup>•-</sup>**

1\1\GINC-NN103\FOpt\UM062X\Aug-CC-pVDZ\C8H20O2P1(2)\JLHODGSO\10-Sep-20  
13\0\# um062x/aug-cc-pVDZ opt SCRF(CPCM,solvent=ethanol)\o2\_rad-an-pe  
th4\_11cccc\_accdm06cpcm\0,2\P,-0.074057604,-0.026301436,-0.3735611611\

C,1.7104484292,-0.020715264,-0.0163634587\C,2.3415412248,1.3556392076,  
-0.2339769054\C,-0.2284165377,0.1857015122,-2.1840165466\C,-1.65513433  
16,0.4821838828,-2.649034232\C,-0.8607225487,-1.6330037731,0.003550523  
\C,0.1620737868,-2.7684629628,0.0634149208\C,-0.8923438444,1.394809731  
4,0.4219689487\C,-2.3400862471,1.1139870052,0.8256145027\O,0.777088230  
5,0.5072007427,2.958327133\O,0.025740074,-0.4602570813,2.4836336453\H,  
1.8089761272,-0.3327444144,1.0264348422\H,2.1637208667,-0.7741006507,-  
0.6723658505\H,3.4149287139,1.2942019717,-0.0250944674\H,2.2215425801,  
1.7096369886,-1.2643333415\H,1.9070339931,2.0956571415,0.4467664053\H,  
0.1517580129,-0.7378926303,-2.6405094424\H,0.4471295114,0.9981875842,-  
2.4763291462\H,-1.6736218092,0.5763948086,-3.7396053428\H,-2.348971365  
3,-0.3194343687,-2.3704000301\H,-2.0227747364,1.4231852994,-2.22383350  
51\H,-1.3774690941,-1.5264506188,0.959137558\H,-1.6011823138,-1.813933  
0155,-0.7849350493\H,-0.3581943354,-3.715523282,0.2413100333\H,0.86799  
33481,-2.6010164879,0.8842386322\H,0.721804091,-2.8633805792,-0.875082  
7004\H,-0.2801097306,1.623477881,1.3017280924\H,-0.8253777019,2.227857  
6187,-0.289536142\H,-2.8047074525,2.0403627064,1.1802256667\H,-2.36570  
85856,0.3832141392,1.6409531786\H,-2.9396997515,0.7334183435,-0.010025  
7608\\Version=AM64L-G09RevA.02\State=2-A\HF=-808.3904836\S2=0.757321\S  
2-1=0.\S2A=0.750026\RMSD=8.766e-09\RMSF=1.053e-05\Dipole=-0.7909898,-0  
.104262,-5.0515479\Quadrupole=7.1753438,7.6393891,-14.8147329,-0.95933

95,-4.453191,-0.3090968\PG=C01 [X(C8H20O2P1)]\@
